# Supplementary material for: Impact of intentional composition tuning on the sintering properties of Ca–Bi co-doped Li7La3Zr2O12 for co-fired solid-state batteries
Source: Royal Society of Chemistry journal article supplement (doi:10.1039/d3ta00921a), 2023-01-01
Supplement: d3ta00921a1.pdf [file d3ta00921a1.pdf]

## Electronic Supplementary Information

### **Impact of intentional composition tuning on the sintering property of Ca-Bi co-doped**

### **Li<sub>7</sub>La<sub>3</sub>Zr<sub>2</sub>O<sub>12</sub> for co-fired solid-state battery**

*Naohiro Hayashi, \* Ken Watanabe, \*\* Tsuyoshi Ohnishi, Kazunori Takada and Kengo Shimano*

\* E-mail: [naohiro.hayashi.j4z@jp.denso.com](mailto:naohiro.hayashi.j4z@jp.denso.com).

\*\* Email: [watanabe.ken.331@m.kyushu-u.ac.jp](mailto:watanabe.ken.331@m.kyushu-u.ac.jp).

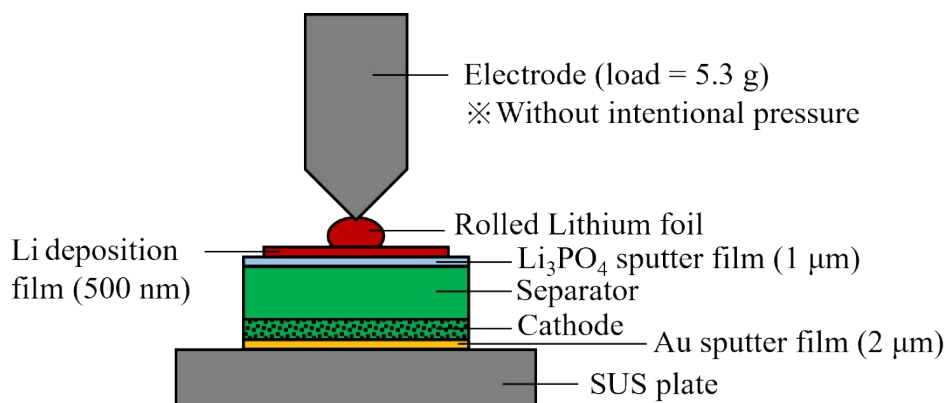

**Figure S1** Schematic of test configuration.

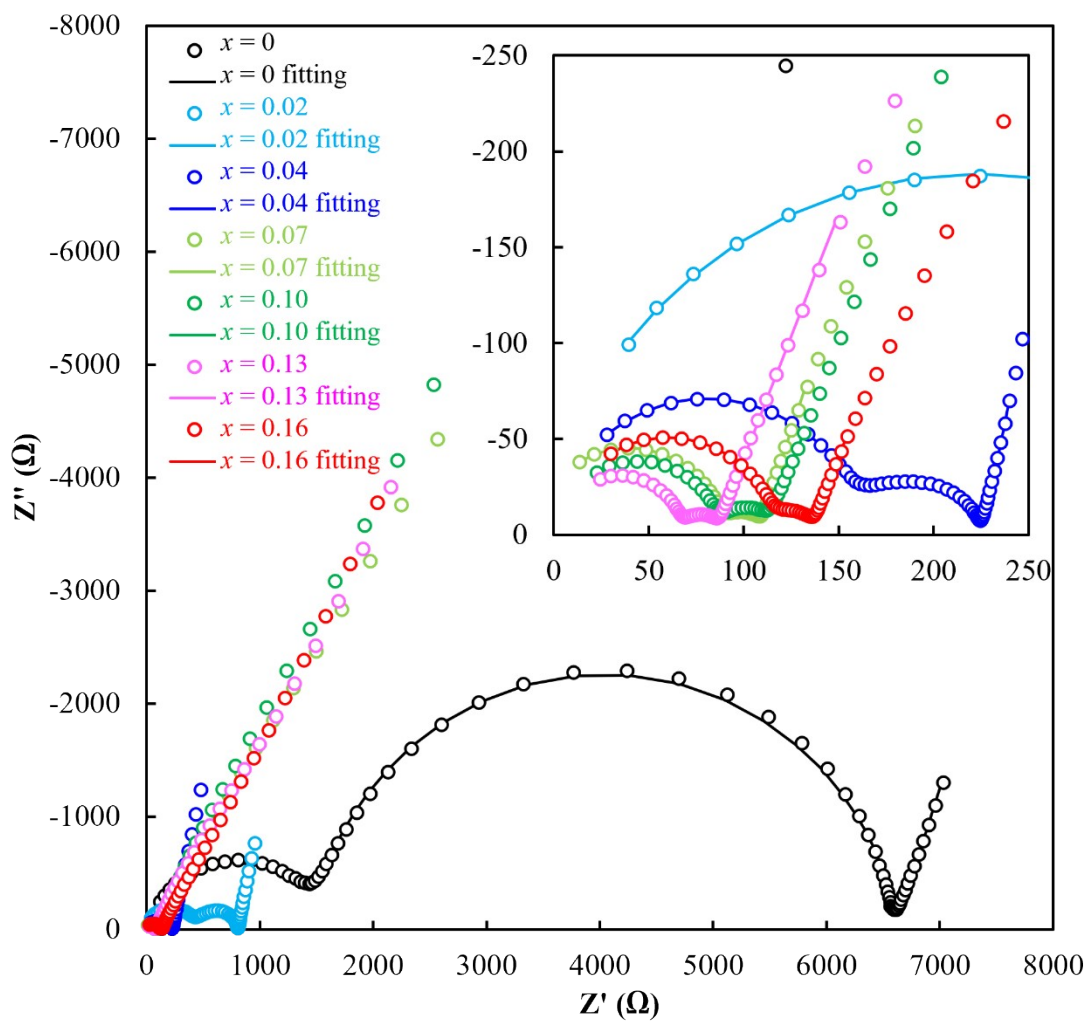

**Figure S2** Nyquist plots measured at 298 K for LLZ-CaBi electrolytes.

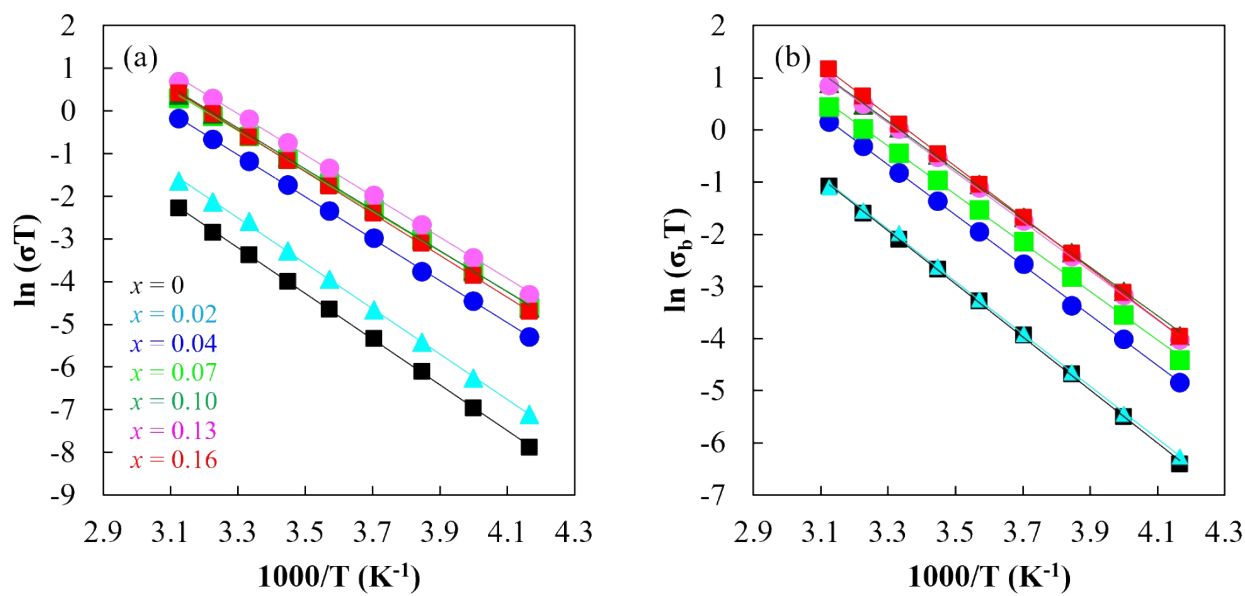

**Figure S3** Arrhenius plots of (a) total ion conductivity and (b) bulk ion conductivity measured at 240–320 K.

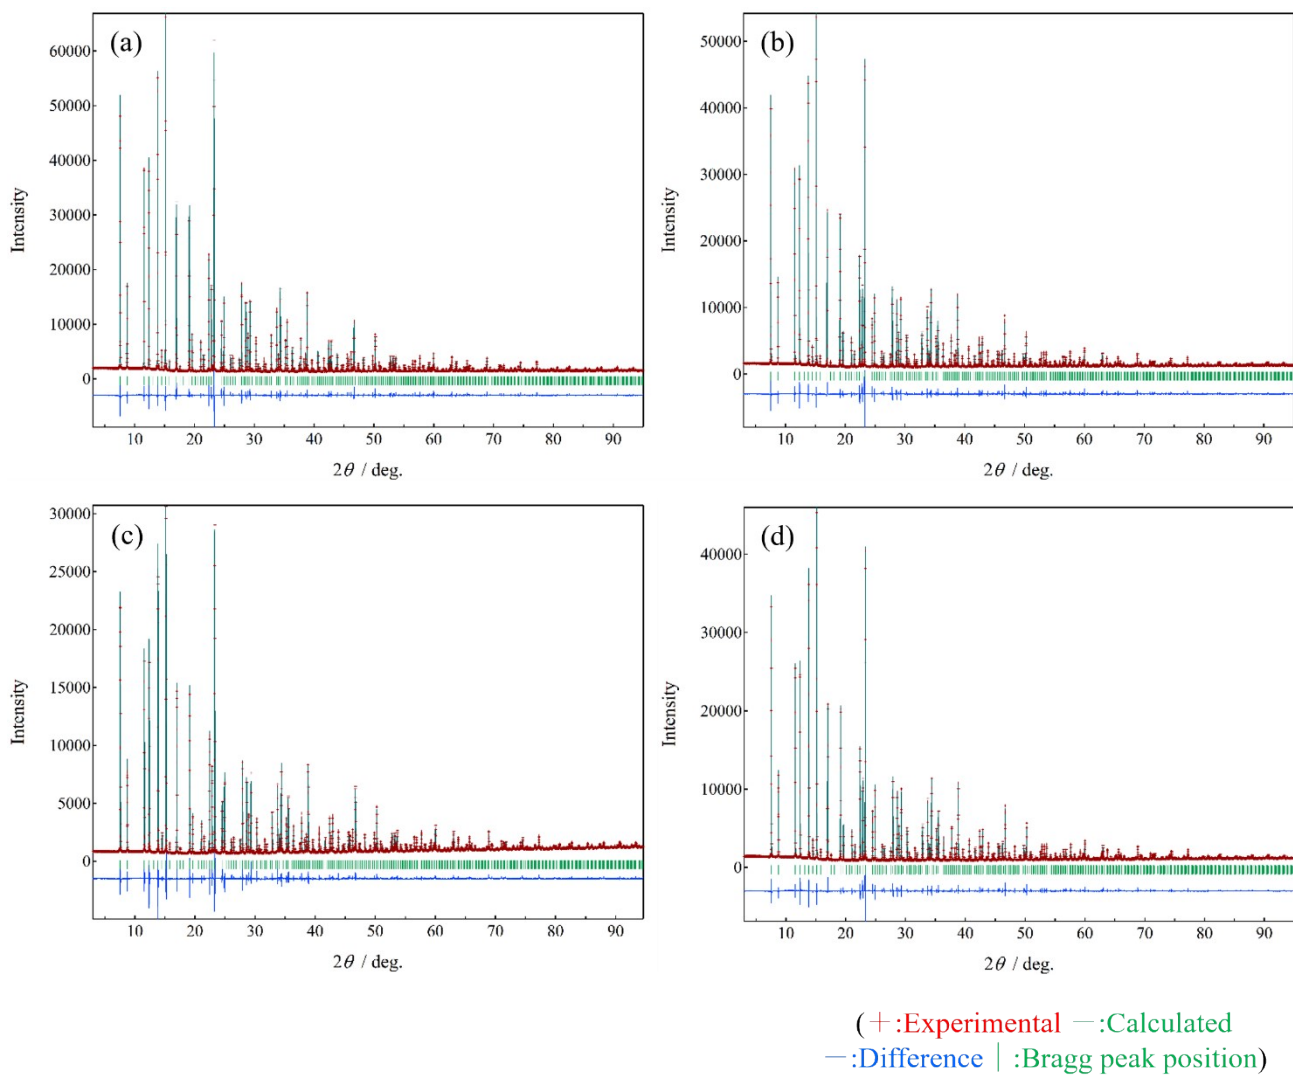

**Figure S4** Rietveld refinement plots using synchrotron powder diffraction data for LLZ-CaBi at  $x =$   
 (a) 0, (b) 0.02, (c) 0.04, (d) 0.07.

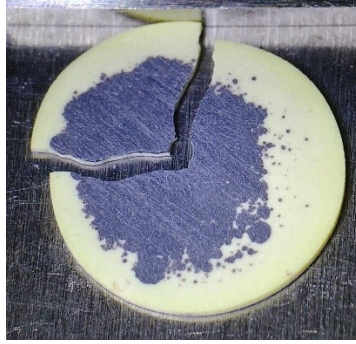

**Figure S5** Photograph of the LLZ-CaBi electrolyte after direct contact with Li metal.
